# Supplementary material for: An intraresidue H-bonding motif in selenocysteine and cysteine, revealed by gas phase laser spectroscopy and quantum chemistry calculations
Source: Royal Society of Chemistry journal article supplement (doi:10.1039/d0cp02825h), 2020-01-01
Supplement: d0cp02825h1.pdf [file d0cp02825h1.pdf]

# An intraresidue H-bonding motif in selenocysteine and cysteine, revealed by gas phase laser spectroscopy and quantum chemistry calculations

G. Goldsztejn, V. Mundlapati, J. Donon, B. Tardivel, E. Gloaguen, V. Brenner and M. Mons\*

Université Paris-Saclay, CEA, CNRS, LIDYL, 91191, Gif-sur-Yvette, France

## Supplementary Information

### Content

**Fig. S1:** H-bonding schemes in conformers A ( $5^{\gamma}$ -7-7) and B ( $5^{\gamma}$ - $\pi$ -10) of the Ac-Cys-Phe-NH<sub>2</sub> and Ac-Sec-Phe-NH<sub>2</sub> molecules and of their truncated models.

**Table S1:** Structural parameters of the most stable theoretical conformations of Ac-Sec-Phe-NH<sub>2</sub>

**Table S2:** Relevant NBO parameters for the  $5^{\gamma}$  bonds of conformations A and B of the dipeptides, of the intrinsic models and for the H-bonds of the relevant intermolecular complexes of the Cys, Sec and Ser residues.

**Table S3:** Interatomic NH...Y distance (pm) and calculated raw harmonic NH stretch frequency frequency (cm<sup>-1</sup>) for the  $5^{\gamma}$  H-bond in conformations A and B of the dipeptides, in the intrinsic models and for the H-bonds of the relevant intermolecular complexes of the Cys, Sec and Ser residues.

**Tables S4-S6 :** RI-B97-D3(BJ)-abc/def2-TZVPPD structures of conformations A and B of the dipeptides, of the intrinsic models and of the relevant intermolecular complexes of the Cys, Sec and Ser residues.

---

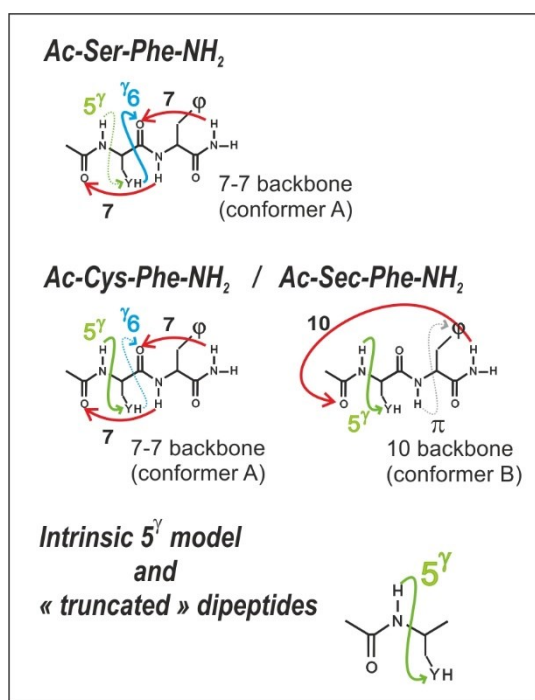

**Figure S1 : Scheme of the H-bonding in conformers A (5<sup>γ</sup>-7-7) and B (5<sup>γ</sup>-π-10) of the Ac-Cys-Phe-NH<sub>2</sub> and Ac-Sec-Phe-NH<sub>2</sub> molecules, together with a truncated version of these molecules, in which the carbonyl of the first peptide bond is not a H-bond acceptor itself. For this purpose the C-terminal peptide link has been changed into a simple methyl group (bottom line); the Me group alone been optimized and the rest of the molecule being frozen. The intrinsic model is an optimized structure of the truncated dipeptide. Depending on the balance between proton donating and accepting properties of Ser and Cys, γ6 and 5<sup>γ</sup> side chain - main chain H-bonds are observed with various relative strengths, as determined from NH stretch spectral shifts (strong and weak H-bonds are figured by full and dotted arrow lines respectively).**

**Table S1: Structural parameters of the most stable theoretical conformations (a-j, see Table 1) of Ac-Sec-Phe-NH<sub>2</sub> at the RI-B97-D3(BJ)-abc/def2-TZVPPD level : Ramachandran dihedral angles ( $\phi$  and  $\psi$ ) and side chain dihedrals of the Sec and Phe residues (in degrees); *distances between i) the NH hydrogen of the Sec residue and the side chain Se atom (NH...Se) and ii) the H atom of the SeH group and the carbonyl acceptor oxygen atom of the Sec residue (SeH...OC), both given in pm. The a, g+ and g- notations correspond to the anti, gauche+ and gauche- orientations of the Sec ( $\chi_{Sec}$ ) and Phe ( $\chi_{Phe}$ ) side chains with respect to the backbone.***

|   |                                         | $\phi_{sec}$ | $\psi_{sec}$ | $\chi_{sec}$ | $\phi_{phe}$ | $\psi_{phe}$ | $\chi_{phe}$ | SeH-OC (pm) | NH-Se (pm) |
|---|-----------------------------------------|--------------|--------------|--------------|--------------|--------------|--------------|-------------|------------|
| a | 5 <sup>γ</sup> -π-10-g+g+               | -70          | -9           | 56           | -94          | 3            | 52           | 338         | 274        |
| b | 5 <sup>γ</sup> -f-7-g+g-                | -95          | -7           | 52           | -87          | 70           | -56          | 339         | 267        |
| c | 5-π-9 <sup>γ</sup> -ag+                 | -154         | 135          | -175         | -99          | 2            | 55           | 434         | 268        |
| d | 5 <sup>γ</sup> -f-10-g+g-               | -70          | -11          | 56           | -97          | 1            | -54          | 340         | 275        |
| e | 5-6 <sup>γ</sup> /π-9 <sup>γ</sup> -ag+ | -157         | 148          | -171         | -88          | -7           | 55           | 425         | 265        |
| f | 5-π-9 <sup>γ</sup> -ag+                 | -90          | 106          | -179         | -101         | 4            | 57           | 290         | 305        |
| g | 5 <sup>γ</sup> -5-π-g+a                 | -99          | 4            | 57           | -162         | 160          | -171         | 311         | 279        |
| h | 5 <sup>γ</sup> -7-7-g+g-                | -140         | 41           | 58           | -168         | 164          | 46           | 456         | 318        |
| i | 5 <sup>γ</sup> -7-7-g+g-                | -83          | 55           | 52           | -88          | 70           | -60          | 251         | 266        |
| j | 5 <sup>γ</sup> -π-10-g-g+               | -69          | -20          | -54          | -82          | -1           | 53           | 489         | 273        |

**Table S2 : Detailed parameters of the NBO(i)→NBO(j) interactions at play in the 5 $\gamma$  motif in the 5 $\gamma$  H-bond in conformers A ( $\gamma$ -turns) and B ( $\beta$ -turns) of the Ac-Ser/Cys/Sec-Phe-NH<sub>2</sub> capped dipeptides, in the truncated version of these conformers centered on the Cys/Sec residue frozen in the geometry of the dipeptide (See Figure S1), in the optimized version of the truncated model, providing an intrinsic model for the 5 $\gamma$  interaction, and in the corresponding intermolecular *trans*-N-methylacetamide---Me-YH (Y = Se, S and O) complexes. Interaction energies E(2) and NBO energy difference  $\Delta\epsilon$  are given in kcal/mol ; NBO occupancy is close to 2 for the donor NBOs considered; the off-diagonal NBO Fock matrix elements F(i,j) are given in atomic units.**

|                                                 | <b>Sec</b>                 |                          |                                  |                          |                                 |                    |
|-------------------------------------------------|----------------------------|--------------------------|----------------------------------|--------------------------|---------------------------------|--------------------|
|                                                 | Intrinsic 5 $\gamma$ model | 5 $\gamma$ model geom. A | Ac-Cys-Phe-NH <sub>2</sub> A 7-7 | 5 $\gamma$ model geom. B | Ac-Cys-Phe-NH <sub>2</sub> B 10 | MAA-Me-SeH complex |
|                                                 | 5 $\gamma$ H-bond          |                          |                                  |                          |                                 | Intermolec.        |
| $E_{(2)}(n_{S/Se} \rightarrow \sigma^*_{NHi})$  | 0.13                       | 0.31                     | 0.29                             | 0.19                     | 0.19                            | 0.21               |
| $n_{S/Se}$ occup.                               | 1.961                      | 1.960                    | 1.960                            | 1.961                    | 1.960                           | 1.962              |
| F(i,j)                                          | 0.012                      | 0.019                    | 0.018                            | 0.015                    | 0.015                           | 0.016              |
| $\Delta\epsilon$                                | 1.45                       | 1.45                     | 1.43                             | 1.45                     | 1.44                            | 1.46               |
| $E_{(2)}(n'_{S/Se} \rightarrow \sigma^*_{NHi})$ | 1.00                       | 2.31                     | 2.55                             | 1.42                     | 1.51                            | 5.54               |
| $n'_{S/Se}$ occup                               | 1.919                      | 1.915                    | 1.912                            | 1.918                    | 1.914                           | 1.916              |
| F(i,j)                                          | 0.028                      | 0.043                    | 0.044                            | 0.033                    | 0.034                           | 0.067              |
| $\Delta\epsilon$                                | 0.98                       | 0.98                     | 0.96                             | 0.98                     | 0.97                            | 1.01               |
| $\Sigma E_{HB} : \text{Sum of } E(2)$           | 1.13                       | 2.62                     | 2.84                             | 1.61                     | 1.70                            | 5.75               |

|                                                 | <b>Cys</b>                 |                          |                                  |                          |                                 |                   |
|-------------------------------------------------|----------------------------|--------------------------|----------------------------------|--------------------------|---------------------------------|-------------------|
|                                                 | Intrinsic 5 $\gamma$ model | 5 $\gamma$ model geom. A | Ac-Cys-Phe-NH <sub>2</sub> A 7-7 | 5 $\gamma$ model geom. B | Ac-Cys-Phe-NH <sub>2</sub> B 10 | MAA-Me-SH complex |
|                                                 | 5 $\gamma$ H-bond          |                          |                                  |                          |                                 | Intermolec.       |
| $E_{(2)}(n_{S/Se} \rightarrow \sigma^*_{NHi})$  | 0.13                       | 0.28                     | 0.29                             | 0.18                     | 0.19                            | 0.36              |
| $n_{S/Se}$ occup.                               | 1.956                      | 1.956                    | 1.956                            | 1.956                    | 1.956                           | 1.957             |
| F(i,j)                                          | 0.012                      | 0.018                    | 0.018                            | 0.015                    | 0.015                           | 0.021             |
| $\Delta\epsilon$                                | 1.43                       | 1.43                     | 1.41                             | 1.43                     | 1.42                            | 1.44              |
| $E_{(2)}(n'_{S/Se} \rightarrow \sigma^*_{NHi})$ | 0.88                       | 1.86                     | 2.09                             | 1.17                     | 1.15                            | 5.93              |
| $n'_{S/Se}$ occup                               | 1.911                      | 1.908                    | 1.905                            | 1.910                    | 1.908                           | 1.909             |
| F(i,j)                                          | 0.027                      | 0.039                    | 0.041                            | 0.031                    | 0.030                           | .070              |
| $\Delta\epsilon$                                | 1.01                       | 1.01                     | 0.99                             | 1.01                     | 0.99                            | 1.04              |
| $\Sigma E_{HB} : \text{Sum of } E(2)$           | 1.01                       | 2.14                     | 2.38                             | 1.35                     | 1.34                            | 6.29              |

|                                                 | <b>Ser</b>                       |                             |                                         |  |                          |
|-------------------------------------------------|----------------------------------|-----------------------------|-----------------------------------------|--|--------------------------|
|                                                 | Intrinsic<br>5 $\gamma$<br>model | 5 $\gamma$ model<br>geom. A | Ac-Ser-<br>Phe-NH <sub>2</sub><br>A 7-7 |  | MAA-<br>Me-OH<br>complex |
|                                                 | 5 $\gamma$ H-bond                |                             |                                         |  | Intermolec.              |
| $E_{(2)}(n_{S/Se} \rightarrow \sigma^*_{NHi})$  | < 0.05                           | < 0.05                      | < 0.05                                  |  | 3.19                     |
| $n_{S/Se}$ occup.                               | -                                | -                           | -                                       |  | 1.9                      |
| $F(i,j)$                                        | -                                | -                           | -                                       |  | 0.063                    |
| $\Delta\epsilon$                                | -                                | -                           | -                                       |  | 1.56                     |
| $E_{(2)}(n'_{S/Se} \rightarrow \sigma^*_{NHi})$ | 0.18                             | 0.21                        | 0.26                                    |  | 1.92                     |
| $n'_{O}$ occup                                  | 1.923                            | 1.922                       | 1.918                                   |  | 1.                       |
| $F(i,j)$                                        | 0.013                            | 0.014                       | 0.015                                   |  | 0.043                    |
| $\Delta\epsilon$                                | 1.14                             | 1.14                        | 1.12                                    |  | 1.21                     |
| $\Sigma E_{HB} : \text{Sum of } E(2)$           | 0.18                             | 0.21                        | 0.26                                    |  | 5.11                     |

**Table S3 : Interatomic NH...Y distance (pm) and calculated raw harmonic NH stretch frequency (cm<sup>-1</sup>) for the 5 $\gamma$  H-bond in conformers A ( $\gamma$ -turns) and B ( $\beta$ -turns) of the Ac-Ser/Cys/Sec-Phe-NH<sub>2</sub> capped dipeptides, in the truncated version of these conformers centered on the Cys/Sec residue frozen in the geometry of the dipeptide (See Figure S1) and in the optimized version of the truncated model, providing an intrinsic model for the 5 $\gamma$  interaction. Scaled frequencies for the intrinsic 5 $\gamma$  motifs have been obtained using the procedure presented in Section 2, in order to provide a spectroscopic benchmark signature comparable to the experimental frequencies observed (Figure 8). For the sake of comparison the intermolecular H-bond in the fully optimized *trans*-methylacetamide – Me-YH complex is also provided.**

| <b>Y</b>                                       | <b>O</b> |      |        | <b>S</b> |      |        | <b>Se</b> |      |        |
|------------------------------------------------|----------|------|--------|----------|------|--------|-----------|------|--------|
|                                                | NH...O   | raw  | scaled | NH...S   | raw  | scaled | NH...Se   | raw  | scaled |
| NH...Y                                         |          |      |        |          |      |        |           |      |        |
| In $\gamma$ -turn env. (5 $\gamma$ -7-7)       | 246      | 3550 |        | 259      | 3497 |        | 266       | 3481 |        |
| Truncated $\gamma$ -turn                       | 246      | 3549 |        | 259      | 3500 |        | 266       | 3483 |        |
| In $\beta$ -turn env. (5 $\gamma$ - $\pi$ -10) | -        | -    |        | 265      | 3513 |        | 274       | 3503 |        |
| Truncated $\beta$ -turn                        | -        | -    |        | 265      | 3515 |        | 274       | 3506 |        |
| Intrinsic 5 $\gamma$ NH...Y                    | 248      | 3564 | 3472   | 272      | 3533 | 3445   | 282       | 3528 | 3440   |
|                                                |          |      |        |          |      |        |           |      |        |
|                                                |          |      |        |          |      |        |           |      |        |
| Intermolecular NH...Y                          |          |      |        |          |      |        |           |      |        |
| <i>trans</i> -N-MAA...CH <sub>3</sub> -YH      | 204      | 3501 |        | 254      | 3469 |        | 266       | 3472 |        |

**Table S4 : RI-B97-D3(BJ)-abc/def2-TZVPPD structures of conformations A and B of Ac-Cys-Phe-NH<sub>2</sub> , of the intrinsic Cys 5<sup>γ</sup> model and of the *trans*-*N*-methylacetamide-Me-SH intermolecular complex; xyz format, coordinates in Å.**

| Dipeptide Conformation A           | Conformation B                              |
|------------------------------------|---------------------------------------------|
| H 2.3799619 -2.0777625 -0.7104681  | H -0.0965168 1.7931385 -2.2115821           |
| C 1.6623768 -2.6884212 -1.2676071  | C 0.5200480 1.1496673 -2.8483544            |
| H 2.0893827 -2.8959303 -2.2508058  | H 0.1418824 1.2277996 -3.8699350            |
| H 1.5019056 -3.6261667 -0.7289950  | H 1.5519637 1.5081182 -2.8093075            |
| C 0.3953114 -1.8823404 -1.4462568  | C 0.3628143 -0.2812028 -2.3782302           |
| O 0.2975786 -0.9846194 -2.2896029  | O -0.6666616 -0.9285629 -2.5708691          |
| N -0.6223447 -2.1941585 -0.6010314 | N 1.4206967 -0.8001160 -1.6883957           |
| H -0.4790768 -2.8530131 0.1549186  | H 2.2095545 -0.2117168 -1.4528159           |
| C -1.9206543 -1.5372840 -0.6228175 | C 1.4101495 -2.1398214 -1.1286979           |
| H -2.1425683 -1.3079370 -1.6729362 | H 0.9978862 -2.8213024 -1.8814894           |
| C -1.9065781 -0.1850218 0.1328041  | C 0.4912162 -2.3301434 0.1031198            |
| O -2.6151911 0.0281869 1.1247995   | O 0.3040056 -3.4519234 0.5571966            |
| C -3.0043519 -2.4798992 -0.0959555 | C 2.8324617 -2.6011152 -0.7967342           |
| H -3.9529417 -1.9465982 -0.0262424 | H 2.7847241 -3.5905408 -0.3410695           |
| H -3.1230054 -3.3155683 -0.7900772 | H 3.4330698 -2.6625092 -1.7081368           |
| S -2.6363568 -3.2552225 1.5226504  | S 3.7616175 -1.4606106 0.2984556            |
| H -2.6564652 -2.1014073 2.2149453  | H 2.9417919 -1.5718296 1.3600753            |
| N -1.0727712 0.7260428 -0.4036158  | N -0.0504910 -1.1927747 0.5979771           |
| H -0.5409330 0.4453657 -1.2291680  | H 0.1971948 -0.3204928 0.1538419            |
| C -0.8126208 2.0275948 0.2081824   | C -1.0624668 -1.1399512 1.6317207           |
| H -0.9114216 1.8907908 1.2902491   | H -0.9751021 -2.0534541 2.2261834           |
| C -1.8904157 3.0582554 -0.2311570  | C -2.5156227 -1.1335775 1.0937371           |
| O -1.6488098 3.9916614 -0.9825830  | O -3.4494759 -1.0554560 1.8850895           |
| C 0.5942215 2.5121793 -0.1421804   | C -0.8217694 0.0925080 2.5380141            |
| H 0.6511806 2.6841544 -1.2208461   | H -1.6617218 0.1516744 3.2337009            |
| H 0.7280679 3.4945131 0.3239898    | H 0.0914837 -0.0830348 3.1145005            |
| C 1.6899573 1.5704443 0.3001470    | C -0.6901758 1.3643377 1.7355166            |
| C 2.6118107 1.0674196 -0.6238112   | C 0.5735970 1.8554276 1.3770850             |
| H 2.5137797 1.3333919 -1.6726120   | H 1.4643681 1.3492636 1.7424032             |
| C 1.8244535 1.1966257 1.6445563    | C -1.8263045 2.0379389 1.2639536            |
| H 1.1240615 1.5786140 2.3835376    | H -2.8116749 1.6698641 1.5344396            |
| C 3.6503342 0.2270545 -0.2173848   | C 0.7030272 2.9851898 0.5669481             |
| H 4.3601624 -0.1441210 -0.9516719  | H 1.6917818 3.3529651 0.3064736             |
| C 2.8511600 0.3474361 2.0538856    | C -1.6998849 3.1653520 0.4533145            |
| H 2.9385738 0.0721836 3.1013995    | H -2.5912337 3.6759196 0.0994889            |
| C 3.7725191 -0.1387632 1.1230862   | C -0.4355567 3.6423166 0.0999447            |
| H 4.5787292 -0.7935878 1.4416850   | H -0.3395279 4.5240050 -0.5274053           |
| N -3.1120416 2.8175414 0.3160144   | N -2.6714307 -1.2170948 -0.2467856          |
| H -3.2751309 1.9606213 0.8340292   | H -1.9059231 -1.2609153 -0.9086023          |
| H -3.8918496 3.3777457 0.0069461   | H -3.6137942 -1.2373405 -0.6047695          |
| intrinsic Cys 5 <sup>γ</sup> model | <i>trans</i> -methylacetamide-Me-SH complex |
| H -1.7158225 2.8451365 -1.3375819  | C 1.6498138 1.2226425 0.5446049             |
| C -0.8043329 2.3355539 -1.6645629  | H 0.7778380 1.8222348 0.2678526             |
| H -0.7587025 2.4136364 -2.7541199  | C 1.2933242 -0.1558073 1.0836857            |
| H 0.0626057 2.8415535 -1.2302110   | O 2.1454544 -0.9284400 1.5132021            |
| C -0.9075943 0.8667590 -1.2855050  | N -0.0313433 -0.4712900 1.0516982           |
| O -1.7723187 0.1335066 -1.7547843  | H -0.6895879 0.1814416 0.6431595            |
| N 0.0301497 0.4269747 -0.3943032   | C -0.5195500 -1.7611220 1.5070190           |
| H 0.6747154 1.0829561 0.0246484    | H 2.2966225 1.1009842 -0.3297053            |
| C 0.0407901 -0.9284931 0.1368084   | H 2.2253576 1.7567164 1.3052507             |
| H -0.4113454 -1.5577626 -0.6381607 | H -0.0250153 -2.5791503 0.9721745           |
| C -0.8073533 -1.0468638 1.4067286  | H -1.5960135 -1.8096747 1.3270556           |
| C 1.4863054 -1.4070851 0.3217486   | H -0.3284101 -1.8996638 2.5764775           |
| H 1.4988753 -2.4274432 0.7122937   | C -0.7713004 0.6112386 -2.3371586           |
| H 2.0019845 -1.4068754 -0.6425367  | H -0.0359145 1.4133462 -2.4236175           |
| S 2.5421362 -0.3479233 1.3874710   | H -1.1852602 0.3995181 -3.3239734           |
| H 1.9143920 -0.5985924 2.5497440   | S -2.0687031 1.2315619 -1.2081134           |
| H -0.8038737 -2.0758179 1.7826869  | H -0.2840458 -0.2734679 -1.9239639          |
| H -1.8390417 -0.7634251 1.1849888  | H -2.8532665 0.1389317 -1.2456484           |
| H -0.4315695 -0.3857948 2.1946472  |                                             |

**Table S5 : RI-B97-D3(BJ)-abc/def2-TZVPPD structures of conformations A and B of Ac-Sec-Phe-NH<sub>2</sub> , of the intrinsic Sec 5<sup>γ</sup> model and of the *trans*-methylacetamide...Me-SeH intermolecular complex ; xyz format, coordinates in Å.**

|                                    |            |            |            |                                              |            |            |            |
|------------------------------------|------------|------------|------------|----------------------------------------------|------------|------------|------------|
| Conformation A                     |            |            |            | Conformation B                               |            |            |            |
| H                                  | -3.1175    | 3.06714    | -1.13987   | H                                            | 1.36052    | 4.11089    | 0.56849    |
| C                                  | -2.31612   | 2.82873    | -0.43164   | C                                            | 1.43352    | 3.04598    | 0.33892    |
| H                                  | -1.39789   | 3.31526    | -0.77191   | H                                            | 2.24975    | 2.87466    | -0.36762   |
| H                                  | -2.59645   | 3.21795    | 0.54677    | H                                            | 1.66509    | 2.51588    | 1.26959    |
| C                                  | -2.17412   | 1.3237     | -0.34244   | C                                            | 0.09135    | 2.56057    | -0.16746   |
| O                                  | -2.81811   | 0.64443    | 0.4638     | O                                            | -0.97211   | 2.89716    | 0.35274    |
| N                                  | -1.31751   | 0.7656     | -1.23702   | N                                            | 0.13511    | 1.68428    | -1.21505   |
| H                                  | -0.69996   | 1.35037    | -1.78837   | H                                            | 1.02694    | 1.33064    | -1.53864   |
| C                                  | -1.14225   | -0.66918   | -1.40891   | C                                            | -1.05549   | 1.05837    | -1.76175   |
| H                                  | -2.12154   | -1.12976   | -1.2164    | H                                            | -1.82101   | 1.8335     | -1.88438   |
| C                                  | -0.16685   | -1.29123   | -0.37524   | C                                            | -1.72296   | 0.00365    | -0.84319   |
| O                                  | 0.80922    | -1.96996   | -0.71462   | O                                            | -2.81668   | -0.46059   | -1.13825   |
| C                                  | -0.73854   | -0.99526   | -2.84351   | C                                            | -0.77647   | 0.4542     | -3.13635   |
| H                                  | -0.4978    | -2.05261   | -2.93636   | H                                            | -1.66997   | -0.05069   | -3.49953   |
| H                                  | -1.55187   | -0.7447    | -3.52741   | H                                            | -0.47879   | 1.22613    | -3.8494    |
| Se                                 | 0.81744    | 0.03343    | -3.53323   | Se                                           | 0.73186    | -0.84656   | -3.17296   |
| H                                  | 1.75892    | -0.57221   | -2.57501   | H                                            | 0.08429    | -1.79782   | -2.25024   |
| N                                  | -0.50419   | -1.04981   | 0.90525    | N                                            | -1.00155   | -0.33557   | 0.24917    |
| H                                  | -1.37165   | -0.54152   | 1.07736    | H                                            | -0.0968    | 0.0967     | 0.3656     |
| C                                  | 0.33116    | -1.44768   | 2.03441    | C                                            | -1.45473   | -1.20252   | 1.31542    |
| H                                  | 1.36282    | -1.45271   | 1.66759    | H                                            | -2.25452   | -1.83179   | 0.91342    |
| C                                  | -0.0143    | -2.89342   | 2.48145    | C                                            | -2.08172   | -0.44789   | 2.51453    |
| O                                  | -0.5703    | -3.14867   | 3.53957    | O                                            | -2.44495   | -1.0781    | 3.50174    |
| C                                  | 0.19065    | -0.4446    | 3.18188    | C                                            | -0.28544   | -2.09703   | 1.79357    |
| H                                  | -0.8439    | -0.44751   | 3.5365     | H                                            | -0.63914   | -2.66048   | 2.65996    |
| H                                  | 0.80069    | -0.80817   | 4.01496    | H                                            | -0.05053   | -2.80455   | 0.99321    |
| C                                  | 0.61389    | 0.94638    | 2.77526    | C                                            | 0.94027    | -1.28622   | 2.13976    |
| C                                  | 1.95596    | 1.22482    | 2.48244    | C                                            | 1.95473    | -1.08187   | 1.19273    |
| H                                  | 2.69972    | 0.43655    | 2.57698    | H                                            | 1.88332    | -1.56402   | 0.22029    |
| C                                  | -0.32103   | 1.9803     | 2.65803    | C                                            | 1.05665    | -0.65903   | 3.38873    |
| H                                  | -1.36673   | 1.77976    | 2.87598    | H                                            | 0.27783    | -0.80841   | 4.13086    |
| C                                  | 2.35281    | 2.4978     | 2.07756    | C                                            | 3.05494    | -0.27242   | 1.48171    |
| H                                  | 3.39854    | 2.69365    | 1.8567     | H                                            | 3.83294    | -0.13163   | 0.73619    |
| C                                  | 0.07287    | 3.25974    | 2.2612     | C                                            | 2.15485    | 0.14962    | 3.67991    |
| H                                  | -0.66554   | 4.05319    | 2.1864     | H                                            | 2.23061    | 0.62341    | 4.65468    |
| C                                  | 1.40989    | 3.52223    | 1.96512    | C                                            | 3.1572     | 0.34742    | 2.72746    |
| H                                  | 1.71797    | 4.51746    | 1.65735    | H                                            | 4.0146     | 0.97322    | 2.95833    |
| N                                  | 0.37554    | -3.83363   | 1.57811    | N                                            | -2.19502   | 0.89476    | 2.39622    |
| H                                  | 0.74244    | -3.55167   | 0.67588    | H                                            | -1.88714   | 1.42209    | 1.58868    |
| H                                  | 0.10601    | -4.79247   | 1.73665    | H                                            | -2.62781   | 1.39449    | 3.15743    |
| intrinsic Sec 5 <sup>γ</sup> model |            |            |            | <i>trans</i> -methylacetamide-Me-SeH complex |            |            |            |
| H                                  | -1.7387612 | 2.8330091  | -1.3776229 | C                                            | 1.6554746  | 1.2235244  | 0.5540175  |
| C                                  | -0.8105491 | 2.3372194  | -1.6775528 | H                                            | 0.7833998  | 1.8279505  | 0.2883833  |
| H                                  | -0.7301793 | 2.4229646  | -2.7645308 | C                                            | 1.2993729  | -0.1669173 | 1.0612594  |
| H                                  | 0.0350865  | 2.8512194  | -1.2117159 | O                                            | 2.1550758  | -0.9638721 | 1.4352467  |
| C                                  | -0.9070460 | 0.8648369  | -1.3110828 | N                                            | -0.0301163 | -0.4640625 | 1.0671692  |
| O                                  | -1.7475682 | 0.1241822  | -1.8114401 | H                                            | -0.6927918 | 0.2122294  | 0.7074677  |
| N                                  | 0.0093981  | 0.4318445  | -0.3942976 | C                                            | -0.5228933 | -1.7600777 | 1.4994250  |
| H                                  | 0.6321904  | 1.0951129  | 0.0462209  | H                                            | 2.3049506  | 1.1216892  | -0.3205063 |
| C                                  | 0.0224971  | -0.9255950 | 0.1317476  | H                                            | 2.2279087  | 1.7417158  | 1.3281801  |
| H                                  | -0.4500982 | -1.5443289 | -0.6404812 | H                                            | -0.0217128 | -2.5675250 | 0.9556739  |
| C                                  | -0.8057632 | -1.0440532 | 1.4143602  | H                                            | -1.5973792 | -1.8058880 | 1.3073713  |
| C                                  | 1.4607333  | -1.4244862 | 0.2817862  | H                                            | -0.3429931 | -1.9166818 | 2.5686240  |
| H                                  | 1.4814287  | -2.4384705 | 0.6837145  | C                                            | -0.7205365 | 0.6036126  | -2.3584437 |
| H                                  | 1.9696508  | -1.4200799 | -0.6848279 | H                                            | -0.0245229 | 1.4277996  | -2.5176437 |
| Se                                 | 2.6492984  | -0.3043012 | 1.4248441  | H                                            | -1.1365815 | 0.2808525  | -3.3117028 |
| H                                  | 1.9821623  | -0.6415321 | 2.6954371  | Se                                           | -2.1621478 | 1.3311400  | -1.2129149 |
| H                                  | -0.8006898 | -2.0741074 | 1.7870228  | H                                            | -0.2159974 | -0.2143745 | -1.8456049 |
| H                                  | -1.8396644 | -0.7549490 | 1.2105123  | H                                            | -2.9585098 | 0.0888850  | -1.2060016 |
| H                                  | -0.4121263 | -0.3884855 | 2.1979062  |                                              |            |            |            |

**Table S6 : RI-B97-D3(BJ)-abc/def2-TZVPPD structures of conformation A of Ac-Ser-Phe-NH<sub>2</sub> , of the intrinsic Ser 5<sup>γ</sup> model and of the *trans*-methylacetamide·Me-OH intermolecular complex ; xyz format, coordinates in Å.**

|                                    |            |            |                                               |
|------------------------------------|------------|------------|-----------------------------------------------|
| Conformation A                     |            |            |                                               |
| H                                  | 2.3913247  | -2.0761613 | -0.7705884                                    |
| C                                  | 1.6557892  | -2.6939951 | -1.2951940                                    |
| H                                  | 2.0516744  | -2.9174455 | -2.2879923                                    |
| H                                  | 1.5129477  | -3.6240633 | -0.7384722                                    |
| C                                  | 0.3848337  | -1.8879793 | -1.4478071                                    |
| O                                  | 0.2726631  | -0.9876999 | -2.2870275                                    |
| N                                  | -0.6210526 | -2.2015724 | -0.5890219                                    |
| H                                  | -0.4693120 | -2.8691118 | 0.1540564                                     |
| C                                  | -1.9235778 | -1.5462896 | -0.6048175                                    |
| H                                  | -2.1724978 | -1.3381543 | -1.6523429                                    |
| C                                  | -1.8888138 | -0.1972616 | 0.1510023                                     |
| O                                  | -2.5486890 | -0.0061898 | 1.1853884                                     |
| C                                  | -2.9706074 | -2.4857598 | -0.0049503                                    |
| H                                  | -3.9534422 | -1.9985372 | -0.0444359                                    |
| H                                  | -3.0115206 | -3.4038061 | -0.5982182                                    |
| O                                  | -2.6353070 | -2.8724749 | 1.3250341                                     |
| H                                  | -2.6795999 | -2.0527172 | 1.8431402                                     |
| N                                  | -1.0915547 | 0.7289645  | -0.4090920                                    |
| H                                  | -0.5800258 | 0.4533097  | -1.2492902                                    |
| C                                  | -0.8129276 | 2.0240813  | 0.2092933                                     |
| H                                  | -0.8998496 | 1.8777694  | 1.2908976                                     |
| C                                  | -1.8934165 | 3.0594052  | -0.2086752                                    |
| O                                  | -1.6618803 | 4.0011298  | -0.9521808                                    |
| C                                  | 0.5934732  | 2.5002521  | -0.1518871                                    |
| H                                  | 0.6497941  | 2.6565633  | -1.2329982                                    |
| H                                  | 0.7305011  | 3.4882120  | 0.3010603                                     |
| C                                  | 1.6857774  | 1.5600867  | 0.3035698                                     |
| C                                  | 2.6045347  | 1.0387807  | -0.6129957                                    |
| H                                  | 2.5057077  | 1.2874206  | -1.6659131                                    |
| C                                  | 1.8201484  | 1.2075110  | 1.6536981                                     |
| H                                  | 1.1222245  | 1.6038878  | 2.3873750                                     |
| C                                  | 3.6409031  | 0.2022054  | -0.1934984                                    |
| H                                  | 4.3499381  | -0.1821401 | -0.9217753                                    |
| C                                  | 2.8442987  | 0.3617818  | 2.0760273                                     |
| H                                  | 2.9315064  | 0.1032511  | 3.1277922                                     |
| C                                  | 3.7633663  | -0.1418964 | 1.1526055                                     |
| H                                  | 4.5681059  | -0.7935169 | 1.4812867                                     |
| N                                  | -3.1088331 | 2.8061912  | 0.3481988                                     |
| H                                  | -3.2601628 | 1.9510942  | 0.8716261                                     |
| H                                  | -3.8964420 | 3.3648745  | 0.0571222                                     |
| intrinsic Ser 5 <sup>γ</sup> model |            |            | <i>trans</i> -N-methylacetamide·Me-OH complex |
| H                                  | 3.5204175  | -0.1587470 | -0.4946302                                    |
| C                                  | 2.7251090  | -0.8593783 | -0.7660795                                    |
| H                                  | 3.0187716  | -1.3411085 | -1.7025983                                    |
| H                                  | 2.6355708  | -1.6187235 | 0.0161772                                     |
| C                                  | 1.4454712  | -0.0730187 | -1.0039558                                    |
| O                                  | 1.3523530  | 0.7611618  | -1.8995207                                    |
| N                                  | 0.4139266  | -0.3627530 | -0.1582205                                    |
| H                                  | 0.5533611  | -1.0084596 | 0.6046769                                     |
| C                                  | -0.8681733 | 0.3303805  | -0.2061396                                    |
| H                                  | -1.0623998 | 0.5604776  | -1.2597027                                    |
| C                                  | -0.8299338 | 1.6470075  | 0.5795947                                     |
| C                                  | -1.9607497 | -0.6256111 | 0.2798557                                     |
| H                                  | -2.9363517 | -0.1217953 | 0.2325000                                     |
| H                                  | -1.9957311 | -1.5049128 | -0.3694883                                    |
| O                                  | -1.7129611 | -1.1387256 | 1.5976309                                     |
| H                                  | -1.8520602 | -0.4250962 | 2.2309039                                     |
| H                                  | -1.7911403 | 2.1683582  | 0.5102226                                     |
| H                                  | -0.0542468 | 2.2988998  | 0.1713355                                     |
| H                                  | -0.6012329 | 1.4720444  | 1.6374382                                     |
| C                                  | -1.6722734 | 1.3805314  | 0.7688354                                     |
| H                                  | -0.8674656 | 1.8438350  | 0.1914275                                     |
| C                                  | -1.3453146 | -0.0260415 | 1.2511098                                     |
| O                                  | -2.1497458 | -0.6989891 | 1.8913941                                     |
| N                                  | -0.1053170 | -0.4839063 | 0.9243764                                     |
| H                                  | 0.5205915  | 0.0991882  | 0.3840621                                     |
| C                                  | 0.3389496  | -1.8105519 | 1.3138411                                     |
| H                                  | -2.5788202 | 1.3381880  | 0.1581621                                     |
| H                                  | -1.8946467 | 2.0047973  | 1.6393848                                     |
| H                                  | -0.3542138 | -2.5765464 | 0.9504454                                     |
| H                                  | 1.3287946  | -1.9867431 | 0.8863761                                     |
| H                                  | 0.3962535  | -1.9064952 | 2.4038395                                     |
| C                                  | 1.1729841  | 0.2936638  | -2.3645942                                    |
| H                                  | 0.1462430  | -0.0441519 | -2.2084919                                    |
| H                                  | 1.1942117  | 0.9845796  | -3.2170727                                    |
| O                                  | 1.5758389  | 0.9431127  | -1.1502551                                    |
| H                                  | 1.8009926  | -0.5790938 | -2.5865876                                    |
| H                                  | 2.4929374  | 1.2246232  | -1.2362528                                    |
